# Supplementary material
Source: Springer Nature journal article supplement (https://www.springerprofessional.de/resource/supplementary/40095_2012_39_MOESM12_ESM.pdf/11899672)

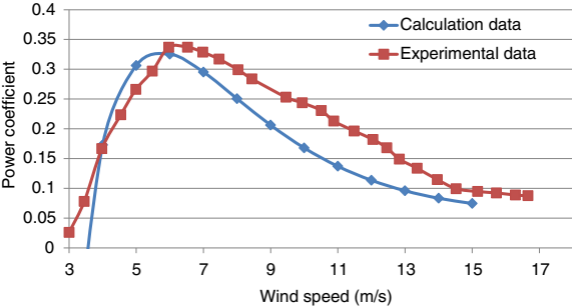

Supplement: MOESM12 [file 11899672]
